# Supplementary material for: Virgin Olive Oil Phenols, Fatty Acid Composition and Sensory Profile: Can Cultivar Overpower Environmental and Ripening Effect?
Source: MDPI journal article supplement (doi:10.3390/antiox10050689), 2021-04-27
Supplement: s1 [file s1]

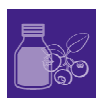

## SUPPLEMENTARY MATERIAL

**Supplemental Table 1.** Basic quality parameters of Oblica virgin olive oils during ripening obtained from two distinct olive orchards (Kaštela and Šestanovac) in three successive crop years

| Factor         |            | FFA            | PV         | K232         | K270        |
|----------------|------------|----------------|------------|--------------|-------------|
| 2010           | Kaštela    | 1. 0.32±0.03ab | 3.6±0.2de  | 1.62±0.01c   | 0.15±0.02ab |
|                |            | 2. 0.38±0.03a  | 4.2±0.2cd  | 1.56±0.02c   | 0.11±0.02b  |
|                |            | 3. 0.33±0.05ab | 6.6±0.2a   | 1.88±0.03a   | 0.21±0.02a  |
|                |            | 4. 0.33±0.01ab | 6.6±0.2a   | 1.85±0.01ab  | 0.21±0.01a  |
|                | Šestanovac | 1. 0.27±0.03bc | 4.6±0.2bc  | 1.67±0.05c   | 0.14±0.01ab |
|                |            | 2. 0.26±0.01bc | 2.6±0.2f   | 1.54±0.07c   | 0.10±0.04b  |
|                |            | 3. 0.35±0.03ab | 5.2±0.4b   | 1.70±0.01bc  | 0.21±0.01a  |
|                |            | 4. 0.18±0.02c  | 3.2±0.2ef  | 1.64±0.08c   | 0.15±0.06ab |
| 2011           | Kaštela    | 1. 0.31±0.02b  | 6.2±0.2a   | 1.78±0.03de  | 0.17±0.03b  |
|                |            | 2. 0.24±0.01c  | 4.0±0.2de  | 1.86±0.02cde | 0.21±0.01a  |
|                |            | 3. 0.25±0.01c  | 4.6±0.2cd  | 1.73±0.08e   | 0.16±0.01b  |
|                |            | 4. 0.31±0.01b  | 5.6±0.6ab  | 2.08±0.09ab  | 0.18±0.01ab |
|                | Šestanovac | 1. 0.38±0.01a  | 5.2±0.2bc  | 1.96±0.01bcd | 0.22±0.01a  |
|                |            | 2. 0.36±0.02a  | 3.6±0.2e   | 2.15±0.02a   | 0.21±0.01a  |
|                |            | 3. 0.38±0.01a  | 5.8±0.2ab  | 2.02±0.05abc | 0.21±0.01a  |
|                |            | 4. 0.26±0.01c  | 5.6±0.4ab  | 2.08±0.01ab  | 0.21±0.01a  |
| 2012           | Kaštela    | 1. 0.23±0.03b  | 4.4±0.2b   | 1.65±0.04d   | 0.15±0.02ab |
|                |            | 2. 0.22±0.01b  | 3.6±0.2cd  | 1.61±0.07d   | 0.17±0.05ab |
|                |            | 3. 0.22±0.02b  | 3.8±0.2c   | 1.53±0.01d   | 0.10±0.02b  |
|                |            | 4. 0.32±0.01a  | 2.6±0.2 f  | 1.44±0.06 e  | 0.11±0.01b  |
|                | Šestanovac | 1. 0.32±0.01a  | 3.2±0.2e   | 2.17±0.01a   | 0.22±0.01a  |
|                |            | 2. 0.23±0.01b  | 7.2±0.2a   | 2.12±0.05a   | 0.20±0.02a  |
|                |            | 3. 0.34±0.01a  | 4.2±0.2b   | 1.95±0.03b   | 0.17±0.01a  |
|                |            | 4. 0.31±0.01a  | 3.4±0.2de  | 1.72±0.02c   | 0.22±0.01a  |
| Crop Year      |            |                |            |              |             |
|                | 2010       | 0.30±0.07a     | 4.44±1.44b | 1.68±0.13b   | 0.16±0.05b  |
|                | 2011       | 0.31±0.06a     | 4.98±0.86a | 1.96±0.16a   | 0.20±0.03a  |
|                | 2012       | 0.27±0.06b     | 3.98±1.36c | 1.76±0.45b   | 0.17±0.05b  |
|                | F          | 20.57          | 181.10     | 253.42       | 16.196      |
|                | p          | ***            | ***        | ***          | ***         |
| Growing area   |            |                |            |              |             |
|                | Kaštela    | 0.29±0.06b     | 4.54±1.26a | 1.72±0.19b   | 0.16±0.04b  |
|                | Šestanovac | 0.30±0.07a     | 4.38±1.34b | 1.89±0.42a   | 0.19±0.05a  |
|                | F          | 6.93           | 14.14      | 63.13        | 23.736      |
|                | p          | *              | ***        | ***          | ***         |
| Harvest period |            |                |            |              |             |
|                | 1.         | 0.31±0.06a     | 4.40±1.04b | 1.81±0.21a   | 0.18±0.04   |
|                | 2.         | 0.28±0.07b     | 4.12±1.50c | 1.81±0.28a   | 0.17±0.06   |
|                | 3.         | 0.31±0.07a     | 4.92±0.98a | 1.80±0.18a   | 0.18±0.05   |
|                | 4.         | 0.29±0.06b     | 4.40±1.56b | 1.76±0.29b   | 0.18±0.05   |
|                | F          | 9.59           | 57.81      | 37.76        | 1.196       |
|                | p          | ***            | ***        | ***          | ns          |

Means marked by different lowercase letters in column (for each crop year) and for each main factor (crop year, growing area and harvest period), are significantly different (Tukey's test,  $p \leq 0.05$ ), ns – not significant. 1–4, harvest period, see also Table 1. Identification: FFA – free fatty acid (% oleic acid); PV – peroxide value (meq O<sub>2</sub>/kg). \*\*\* median of olive fruitiness in all samples was > 0; median of sensory defect in all samples was < 0.

**Supplemental Table 2.** Basic quality parameters of Leccino virgin olive oils during ripening obtained from two distinct olive orchards (Kaštela and Šestanovac) in three successive crop years

| Factor         |            |             | FFA         | PV          | K <sub>232</sub> | K <sub>270</sub> |
|----------------|------------|-------------|-------------|-------------|------------------|------------------|
| 2010           | Kaštela    | 1.          | 0.36±0.04ab | 0.15±0.02ab | 1.72±0.01e       | 0.18±0.02b       |
|                |            | 2.          | 0.35±0.01ab | 0.11±0.02b  | 1.80±0.02d       | 0.21±0.01a       |
|                |            | 3.          | 0.31±0.02b  | 0.21±0.02a  | 1.50±0.02f       | 0.13±0.01c       |
|                |            | 4.          | 0.31±0.01b  | 0.21±0.01a  | 1.78±0.01d       | 0.22±0.01a       |
|                | Šestanovac | 1.          | 0.32±0.02ab | 0.14±0.01ab | 1.97±0.02b       | 0.17±0.02b       |
|                |            | 2.          | 0.30±0.02b  | 0.10±0.04b  | 1.91±0.01c       | 0.21±0.01a       |
|                |            | 3.          | 0.37±0.02a  | 0.21±0.01a  | 2.02±0.03a       | 0.17±0.01b       |
|                |            | 4.          | 0.18±0.02c  | 0.15±0.06ab | 1.71±0.01e       | 0.12±0.01c       |
| 2011           | Kaštela    | 1.          | 0.39±0.03a  | 0.17±0.03b  | 1.72±0.03c       | 0.14±0.03a       |
|                |            | 2.          | 0.42±0.02a  | 0.21±0.01a  | 1.72±0.05c       | 0.19±0.05a       |
|                |            | 3.          | 0.24±0.01c  | 0.16±0.01b  | 1.83±0.03b       | 0.16±0.05a       |
|                |            | 4.          | 0.24±0.02c  | 0.18±0.01ab | 1.79±0.03bc      | 0.15±0.01a       |
|                | Šestanovac | 1.          | 0.40±0.01a  | 0.22±0.01a  | 2.05±0.01a       | 0.21±0.01a       |
|                |            | 2.          | 0.32±0.02b  | 0.21±0.01a  | 1.97±0.01a       | 0.21±0.02a       |
|                |            | 3.          | 0.35±0.02ab | 0.21±0.01a  | 1.97±0.02a       | 0.21±0.01a       |
|                |            | 4.          | 0.25±0.02c  | 0.21±0.01a  | 1.77±0.01bc      | 0.12±0.01a       |
| 2012           | Kaštela    | 1.          | 0.21±0.01c  | 0.15±0.02ab | 1.58±0.01a       | 0.17±0.01a       |
|                |            | 2.          | 0.21±0.02c  | 0.17±0.05ab | 1.51±0.07a       | 0.13±0.03ab      |
|                |            | 3.          | 0.23±0.01b  | 0.10±0.02b  | 1.79±0.17a       | 0.12±0.02b       |
|                |            | 4.          | 0.35±0.01a  | 0.11±0.01b  | 1.64±0.04a       | 0.14±0.03abc     |
|                | Šestanovac | 1.          | 0.24±0.03bc | 0.22±0.01a  | 1.52±0.03a       | 0.16±0.01ab      |
|                |            | 2.          | 0.24±0.02bc | 0.20±0.02a  | 1.68±0.04a       | 0.17±0.02a       |
|                |            | 3.          | 0.29±0.03b  | 0.17±0.01a  | 1.64±0.07a       | 0.14±0.02abc     |
|                |            | 4.          | 0.38±0.02a  | 0.22±0.01a  | 1.88±0.06a       | 0.16±0.01ab      |
| Crop Year      |            |             |             |             |                  |                  |
|                | 2010       | 0.31±0.06a  | 5.84±1.44b  | 1.80±0.17a  | 0.18±0.04a       |                  |
|                | 2011       | 0.32±0.08a  | 6.50±1.16a  | 1.85±0.13a  | 0.17±0.04a       |                  |
|                | 2012       | 0.27±0.07b  | 5.02±1.84c  | 1.65±0.39b  | 0.14±0.03b       |                  |
|                | F          | 61.73       | 102.72      | 32.721      | 22.632           |                  |
|                | p          | ***         | ***         | ***         | ***              |                  |
| Growing area   |            |             |             |             |                  |                  |
|                | Kaštela    | 0.30±0.08   | 5.66±1.92b  | 1.69±0.43b  | 0.16±0.04        |                  |
|                | Šestanovac | 0.30±0.07   | 5.90±1.24a  | 1.83±0.38a  | 0.16±0.04        |                  |
|                | F          | 0.10        | 8.27        | 12.275      | 0.394            |                  |
|                | p          | ns          | ***         | ***         | ns               |                  |
| Harvest period |            |             |             |             |                  |                  |
|                | 1.         | 0.32±0.08a  | 6.50±1.08a  | 1.76±0.21a  | 0.17±0.03ab      |                  |
|                | 2.         | 0.31±0.08ab | 6.08±1.14b  | 1.77±0.17a  | 0.18±0.06a       |                  |
|                | 3.         | 0.30±0.06bc | 5.12±1.66c  | 1.72±0.12b  | 0.15±0.04b       |                  |
|                | 4.         | 0.29±0.08c  | 5.42±2.1c   | 1.77±0.21a  | 0.15±0.04b       |                  |
|                | F          | 9.30        | 55.10       | 7.121       | 5.887            |                  |
|                | p          | ***         | ***         | **          | ***              |                  |

Means marked by different lowercase letters in column (for each crop year) and for each main factor (crop year, growing area and harvest period), are significantly different (Tukey's test,  $p \leq 0.05$ ), ns – not significant. 1–4, harvest period, see also Table 1. Identification: FFA – free fatty acid (% oleic acid); PV – peroxide value (meq O<sub>2</sub>/kg); \*\*\* median of olive fruity in all samples was > 0; median of sensory defect in all samples was < 0.

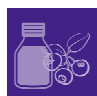

**Supplemental Table 3.** Less represented fatty acids and the percentage of total saturated, monounsaturated, and polyunsaturated fatty acids of Oblica virgin olive oils during ripening obtained from two distinct olive orchards (Kaštela and Šestanovac) in three successive crop years

| Factor |            |    | Fatty acid |            |            |           |           |             |             |              |            |
|--------|------------|----|------------|------------|------------|-----------|-----------|-------------|-------------|--------------|------------|
|        |            |    | C17:1      | C20:0      | C20:1      | C22:0     | C24:0     | SFA         | PUFA        | MUFA         | MUFA/PUFA  |
| 2010   | Kaštela    | 1. | 0.11±0.01  | 0.51±0.01a | 0.41±0.01  | 0.11±0.01 | 0.10±0.01 | 17.13±0.03a | 10.51±0.02e | 72.45±0.03g  | 6.90±0.01d |
|        |            | 2. | 0.11±0.01  | 0.51±0.01a | 0.41±0.01  | 0.11±0.01 | 0.10±0.01 | 16.65±0.12b | 11.01±0.02b | 72.43±0.03g  | 6.58±0.01g |
|        |            | 3. | 0.11±0.01  | 0.41±0.01b | 0.41±0.01  | 0.11±0.01 | 0.11±0.01 | 15.72±0.02c | 10.82±0.03c | 73.54±0.03f  | 6.81±0.02e |
|        |            | 4. | 0.11±0.01  | 0.41±0.01b | 0.41±0.01  | 0.11±0.01 | 0.11±0.01 | 14.74±0.02e | 11.13±0.02a | 74.12±0.02e  | 6.67±0.01f |
|        | Šestanovac | 1. | 0.11±0.01  | 0.51±0.01a | 0.41±0.01  | 0.11±0.01 | 0.11±0.01 | 15.74±0.02c | 9.23±0.03h  | 75.12±0.02c  | 8.15±0.03a |
|        |            | 2. | 0.11±0.01  | 0.41±0.01b | 0.41±0.01  | 0.11±0.01 | 0.11±0.01 | 15.23±0.04d | 10.21±0.01g | 74.63±0.03d  | 7.32±0.01b |
|        |            | 3. | 0.10±0.01  | 0.41±0.01b | 0.41±0.01  | 0.11±0.01 | 0.11±0.01 | 13.55±0.04f | 10.41±0.01f | 76.03±0.03b  | 7.31±0.01b |
|        |            | 4. | 0.11±0.01  | 0.41±0.01b | 0.41±0.01  | 0.11±0.01 | 0.11±0.01 | 12.72±0.03g | 10.62±0.03d | 77.06±0.05a  | 7.26±0.02c |
| 2011   | Kaštela    | 1. | 0.10±0.01  | 0.41±0.01  | 0.31±0.01b | 0.10±0.01 | 0.11±0.01 | 17.42±0.04c | 15.10±0.02c | 67.51±0.01f  | 4.48±0.01f |
|        |            | 2. | 0.10±0.01  | 0.41±0.01  | 0.31±0.01b | 0.11±0.01 | 0.10±0.01 | 18.02±0.02a | 15.31±0.01a | 66.61±0.01h  | 4.36±0.01h |
|        |            | 3. | 0.11±0.01  | 0.41±0.01  | 0.31±0.01b | 0.11±0.01 | 0.11±0.01 | 17.61±0.03b | 15.21±0.01b | 67.21±0.01g  | 4.43±0.01g |
|        |            | 4. | 0.11±0.01  | 0.41±0.01  | 0.41±0.01a | 0.11±0.01 | 0.11±0.01 | 16.41±0.01d | 15.01±0.01d | 68.42±0.03e  | 4.57±0.01e |
|        | Šestanovac | 1. | 0.11±0.01  | 0.41±0.01  | 0.31±0.01b | 0.11±0.01 | 0.10±0.01 | 17.22±0.02e | 12.01±0.01e | 70.61±0.01d  | 5.89±0.01d |
|        |            | 2. | 0.11±0.01  | 0.41±0.01  | 0.31±0.02b | 0.11±0.01 | 0.11±0.01 | 16.51±0.01g | 11.91±0.01g | 71.52±0.02c  | 6.01±0.01b |
|        |            | 3. | 0.11±0.01  | 0.41±0.01  | 0.31±0.01b | 0.11±0.01 | 0.11±0.01 | 15.81±0.02f | 11.81±0.01h | 72.31±0.01b  | 6.13±0.01a |
|        |            | 4. | 0.11±0.01  | 0.41±0.01  | 0.31±0.01b | 0.10±0.01 | 0.11±0.01 | 15.21±0.01h | 12.21±0.02f | 72.61±0.01a  | 5.95±0.01c |
| 2012   | Kaštela    | 1. | 0.11±0.01  | 0.51±0.01a | 0.41±0.01a | 0.11±0.01 | 0.10±0.01 | 18.22±0.06a | 12.72±0.04d | 69.11±0.05g  | 5.44±0.03  |
|        |            | 2. | 0.11±0.01  | 0.51±0.01a | 0.41±0.01a | 0.11±0.01 | 0.10±0.01 | 17.81±0.03b | 13.01±0.03c | 69.24±0.03fg | 5.33±0.01  |
|        |            | 3. | 0.10±0.01  | 0.51±0.01a | 0.41±0.01a | 0.11±0.01 | 0.11±0.01 | 17.23±0.07c | 14.51±0.11a | 69.41±0.01e  | 4.79±0.04  |
|        |            | 4. | 0.11±0.01  | 0.51±0.01a | 0.41±0.01a | 0.10±0.01 | 0.11±0.01 | 16.61±0.01d | 14.11±0.03b | 69.31±0.02ef | 4.92±0.01  |
|        | Šestanovac | 1. | 0.11±0.01  | 0.51±0.01a | 0.31±0.01b | 0.10±0.01 | 0.11±0.01 | 17.70±0.06c | 11.01±0.01e | 71.42±0.08d  | 6.50±0.01  |
|        |            | 2. | 0.10±0.01  | 0.41±0.01b | 0.31±0.01b | 0.11±0.01 | 0.11±0.01 | 16.63±0.05d | 10.51±0.04f | 72.81±0.09c  | 6.94±0.02  |
|        |            | 3. | 0.11±0.01  | 0.41±0.01b | 0.31±0.01b | 0.11±0.01 | 0.11±0.01 | 15.63±0.04e | 10.51±0.01f | 73.81±0.07b  | 7.03±0.01  |
|        |            | 4. | 0.11±0.01  | 0.41±0.01b | 0.31±0.01b | 0.11±0.01 | 0.11±0.01 | 14.73±0.03f | 9.92±0.04g  | 75.43±0.04a  | 7.62±0.03  |

Supplemental Table 3. (continued)

| Factor         | Fatty acid |           |            |            |           |           |             |             |             |            |
|----------------|------------|-----------|------------|------------|-----------|-----------|-------------|-------------|-------------|------------|
|                | C17:1      | C20:0     | C20:1      | C22:0      | C24:0     | SFA       | PUFA        | MUFA        | MUFA/PUFA   |            |
| Main effects   |            |           |            |            |           |           |             |             |             |            |
| Crop Year      |            |           |            |            |           |           |             |             |             |            |
|                | 2010       | 0.11±0.01 | 0.44±0.05b | 0.41±0.01a | 0.11±0.01 | 0.11±0.01 | 15.19±1.43c | 10.49±0.57c | 74.42±1.57a | 7.13±0.49a |
|                | 2011       | 0.11±0.01 | 0.41±0.01c | 0.32±0.04c | 0.11±0.01 | 0.11±0.01 | 16.77±0.92b | 13.57±1.63a | 69.60±2.33c | 5.23±0.80c |
|                | 2012       | 0.11±0.01 | 0.47±0.05a | 0.36±0.06b | 0.11±0.01 | 0.11±0.01 | 16.82±1.13a | 12.04±1.7b  | 71.32±2.35b | 6.07±1.04b |
|                | F          | 0.062     | 11261.0    | 4077.6     | 0.466     | 1.414     | 14558       | 69621       | 205993      | 133189     |
|                | p          | ns        | ***        | ***        | ns        | ns        | ***         | ***         | ***         | ***        |
| Growing site   |            |           |            |            |           |           |             |             |             |            |
|                | Kaštela    | 0.11±0.01 | 0.46±0.06a | 0.38±0.05a | 0.11±0.01 | 0.11±0.01 | 16.96±0.98a | 13.20±1.86a | 69.95±2.48b | 5.44±0.99b |
|                | Šestanovac | 0.11±0.01 | 0.42±0.04b | 0.34±0.05b | 0.11±0.01 | 0.11±0.01 | 15.56±1.39b | 10.86±0.91b | 73.61±1.99a | 6.84±0.72a |
|                | F          | 0.423     | 9153.0     | 2817.7     | 0.135     | 0.131     | 25042       | 121100      | 122194      | 217666     |
|                | p          | ns        | ***        | ***        | ns        | ns        | ***         | ***         | ***         | ***        |
| Harvest period |            |           |            |            |           |           |             |             |             |            |
|                | 1.         | 0.11±0.01 | 0.47±0.05a | 0.36±0.06b | 0.11±0.01 | 0.11±0.01 | 17.24±0.79a | 11.76±1.92d | 71.04±2.49d | 6.23±1.19a |
|                | 2.         | 0.11±0.01 | 0.44±0.05b | 0.36±0.06b | 0.11±0.01 | 0.11±0.01 | 16.81±0.95b | 11.99±1.81c | 71.20±2.69c | 6.09±1.04c |
|                | 3.         | 0.11±0.01 | 0.42±0.04c | 0.36±0.06b | 0.11±0.01 | 0.11±0.01 | 15.93±1.35c | 12.21±2.00a | 72.05±3.02b | 6.08±1.14c |
|                | 4.         | 0.11±0.01 | 0.42±0.04c | 0.37±0.05a | 0.11±0.01 | 0.11±0.01 | 15.07±1.33d | 12.17±1.9b  | 72.83±3.21a | 6.16±1.17b |
|                | F          | 0.621     | 4564.0     | 108.8      | 0.422     | 1.563     | 11747       | 911         | 10481       | 502        |
|                | p          | ns        | ***        | ***        | ns        | ns        | ***         | ***         | ***         | ***        |

Means marked by different lowercase letters in column (for each crop year) and for each main factor (crop year, growing area and harvest period), are significantly different (Tukey's test,  $p \leq 0.05$ ), ns – not significant. 1–4, harvest period, see also Table 1. Values were calculated as the percentage of the total.

**Supplemental Table 4.** Less represented fatty acids and the percentage of total saturated, monounsaturated, and polyunsaturated fatty acids of Leccino virgin olive oils during ripening obtained from two distinct olive orchards (Kaštela and Šestanovac) in three successive crop years

| Factor |            |    | Fatty acid |            |           |           |           |             |             |             |             |
|--------|------------|----|------------|------------|-----------|-----------|-----------|-------------|-------------|-------------|-------------|
|        |            |    | C17:1      | C20:0      | C20:1     | C22:0     | C24:0     | SFA         | PUFA        | MUFA        | MUFA/PUFA   |
| 2010   | Kaštela    | 1. | 0.10±0.00  | 0.41±0.01a | 0.30±0.00 | 0.11±0.01 | 0.10±0.00 | 18.37±0.04a | 8.82±0.02a  | 73.04±0.06g | 8.29±0.02g  |
|        |            | 2. | 0.10±0.00  | 0.41±0.01a | 0.30±0.00 | 0.11±0.01 | 0.10±0.00 | 17.91±0.01b | 7.91±0.01b  | 74.22±0.02f | 9.40±0.01f  |
|        |            | 3. | 0.10±0.00  | 0.31±0.01b | 0.30±0.00 | 0.11±0.01 | 0.10±0.00 | 17.11±0.01c | 7.31±0.01c  | 75.72±0.03e | 10.38±0.01e |
|        |            | 4. | 0.10±0.00  | 0.31±0.01b | 0.30±0.00 | 0.11±0.01 | n.d.      | 16.61±0.01d | 6.62±0.02e  | 76.64±0.06c | 11.59±0.02c |
|        | Šestanovac | 1. | n.d.       | 0.31±0.01b | 0.30±0.00 | 0.11±0.01 | 0.10±0.00 | 17.92±0.02b | 7.91±0.02b  | 74.22±0.02f | 9.39±0.02f  |
|        |            | 2. | 0.10±0.00  | 0.41±0.01a | 0.30±0.00 | 0.11±0.01 | 0.10±0.00 | 17.21±0.01c | 6.82±0.02d  | 76.16±0.06d | 11.19±0.04d |
|        |            | 3. | 0.10±0.00  | 0.31±0.01b | 0.30±0.00 | 0.11±0.01 | 0.10±0.00 | 16.63±0.03d | 6.21±0.01f  | 77.32±0.03a | 12.47±0.01b |
|        |            | 4. | 0.10±0.00  | 0.31±0.01b | 0.20±0.00 | 0.11±0.01 | n.d.      | 15.81±0.01e | 6.13±0.04g  | 77.11±0.01b | 12.59±0.07a |
| 2011   | Kaštela    | 1. | 0.10±0.00  | 0.31±0.01  | 0.31±0.02 | 0.11±0.01 | 0.10±0.00 | 17.42±0.02c | 9.35±0.05d  | 73.36±0.02e | 7.85±0.04e  |
|        |            | 2. | 0.10±0.00  | 0.31±0.01  | 0.31±0.01 | 0.11±0.01 | 0.10±0.00 | 17.61±0.03b | 10.03±0.01c | 72.91±0.01g | 7.28±0.01f  |
|        |            | 3. | 0.10±0.00  | 0.31±0.01  | 0.31±0.01 | 0.10±0.01 | 0.10±0.00 | 17.02±0.02d | 10.34±0.05b | 71.81±0.01h | 6.96±0.04g  |
|        |            | 4. | 0.10±0.00  | 0.31±0.01  | 0.31±0.01 | 0.11±0.01 | 0.10±0.00 | 16.53±0.02f | 10.54±0.02a | 73.03±0.03f | 6.94±0.02g  |
|        | Šestanovac | 1. | 0.10±0.00  | 0.31±0.01  | 0.31±0.01 | 0.11±0.01 | 0.10±0.00 | 18.02±0.02a | 7.73±0.03e  | 74.32±0.03d | 9.63±0.03d  |
|        |            | 2. | 0.10±0.00  | 0.31±0.02  | 0.31±0.01 | 0.11±0.01 | n.d.      | 17.43±0.03c | 7.02±0.02g  | 75.53±0.02b | 10.78±0.02b |
|        |            | 3. | 0.10±0.00  | 0.31±0.01  | 0.31±0.01 | 0.11±0.01 | n.d.      | 16.61±0.01e | 7.21±0.01f  | 75.25±0.02c | 10.45±0.02c |
|        |            | 4. | 0.10±0.00  | 0.31±0.02  | 0.31±0.01 | 0.11±0.01 | n.d.      | 16.13±0.02g | 6.72±0.01h  | 77.21±0.01a | 11.50±0.01a |
| 2012   | Kaštela    | 1. | 0.10±0.00  | 0.41±0.01a | 0.31±0.01 | 0.11±0.01 | 0.10±0.00 | 20.03±0.22a | 9.52±0.02a  | 70.67±0.07e | 7.43±0.02h  |
|        |            | 2. | 0.10±0.00  | 0.31±0.04b | 0.31±0.02 | 0.11±0.01 | 0.10±0.00 | 18.52±0.06c | 7.61±0.03d  | 73.82±0.06c | 9.71±0.05e  |
|        |            | 3. | 0.10±0.00  | 0.31±0.01b | 0.31±0.01 | 0.11±0.01 | 0.10±0.00 | 18.13±0.03d | 6.74±0.06f  | 75.23±0.05b | 11.17±0.10c |
|        |            | 4. | 0.10±0.00  | 0.31±0.02b | 0.31±0.01 | 0.11±0.01 | 0.10±0.00 | 18.12±0.02d | 6.61±0.04g  | 75.32±0.02b | 11.41±0.07b |
|        | Šestanovac | 1. | 0.10±0.00  | 0.41±0.01a | 0.31±0.01 | 0.11±0.01 | 0.10±0.00 | 19.31±0.06b | 8.41±0.02b  | 72.1±0.07d  | 8.58±0.02g  |
|        |            | 2. | 0.10±0.00  | 0.31±0.01b | 0.31±0.01 | 0.10±0.00 | 0.10±0.00 | 18.11±0.02d | 8.01±0.01c  | 73.93±0.05c | 9.24±0.01f  |
|        |            | 3. | 0.10±0.00  | 0.31±0.01b | 0.31±0.01 | 0.11±0.01 | 0.10±0.00 | 17.32±0.04e | 7.21±0.01e  | 75.42±0.02b | 10.47±0.01d |
|        |            | 4. | 0.10±0.00  | 0.31±0.01b | 0.31±0.01 | 0.11±0.01 | n.d.      | 15.24±0.06f | 6.41±0.02h  | 77.93±0.04a | 12.17±0.03a |

Supplemental Table 4. (continued)

| Factor         |            | Fatty acid |            |            |           |            |             |            |             |             |
|----------------|------------|------------|------------|------------|-----------|------------|-------------|------------|-------------|-------------|
|                |            | C17:1      | C20:0      | C20:1      | C22:0     | C24:0      | SFA         | PUFA       | MUFA        | MUFA/PUFA   |
| Main effects   |            |            |            |            |           |            |             |            |             |             |
| Crop Year      |            |            |            |            |           |            |             |            |             |             |
|                | 2010       | 0.08±0.03b | 0.34±0.05a | 0.29±0.04b | 0.11±0.01 | 0.07±0.4b  | 17.2±0.81b  | 7.21±0.91c | 75.55±1.50a | 10.66±1.49a |
|                | 2011       | 0.10±0.01a | 0.31±0.01c | 0.31±0.01a | 0.11±0.01 | 0.06±0.05c | 17.1±0.61c  | 8.62±1.54a | 74.18±1.68c | 8.92±1.79c  |
|                | 2012       | 0.11±0.01a | 0.33±0.05b | 0.31±0.01a | 0.11±0.01 | 0.08±0.03a | 18.1±1.37a  | 7.56±1.01b | 74.3±2.13b  | 10.02±1.52b |
|                | F          | 3253       | 116.0      | 86.6       | 0.308     | 12795      | 2825        | 22353      | 11608       | 16536       |
|                | p          | ***        | ***        | ***        | ns        | ***        | ***         | ***        | ***         | ***         |
| Growing site   |            |            |            |            |           |            |             |            |             |             |
|                | Kaštela    | 0.10±0.00a | 0.33±0.05a | 0.31±0.01a | 0.11±0.01 | 0.09±0.03a | 17.78±0.95a | 8.45±1.45a | 73.81±1.67b | 9.03±1.75b  |
|                | Šestanovac | 0.09±0.03b | 0.32±0.04b | 0.3±0.03b  | 0.11±0.01 | 0.06±0.05b | 17.15±1.1b  | 7.15±0.72b | 75.54±1.67a | 10.70±1.29a |
|                | F          | 3270       | 19.5       | 77.8       | 0.052     | 65780      | 2815        | 53144      | 45033       | 44642       |
|                | p          | ***        | ***        | ***        | ns        | ***        | ***         | ***        | ***         | ***         |
| Harvest period |            |            |            |            |           |            |             |            |             |             |
|                | 1.         | 0.08±0.04b | 0.36±0.06a | 0.31±0.01a | 0.11±0.01 | 0.10±0.00c | 18.51±0.93a | 8.62±0.70a | 72.95±1.31d | 8.53±0.81d  |
|                | 2.         | 0.10±0.00a | 0.34±0.05b | 0.31±0.01a | 0.11±0.01 | 0.08±0.04a | 17.80±0.45b | 7.90±1.08b | 74.43±1.13c | 9.60±1.30c  |
|                | 3.         | 0.10±0.00a | 0.31±0.01c | 0.31±0.01a | 0.11±0.01 | 0.08±0.04a | 17.14±0.53c | 7.50±1.37c | 75.12±1.70b | 10.32±1.72b |
|                | 4.         | 0.10±0.00a | 0.31±0.01c | 0.29±0.04b | 0.11±0.01 | 0.03±0.05b | 16.41±0.92d | 7.17±1.57d | 76.2±1.68a  | 11.03±1.94a |
|                | F          | 3251       | 163.1      | 73.2       | 0.185     | 50064      | 5666        | 12291      | 28018       | 18261       |
|                | p          | ***        | ***        | ***        | ns        | ***        | ***         | ***        | ***         | ***         |

Means marked by different lowercase letters in column (for each crop year) and for each main factor (crop year, growing area and harvest period), are significantly different (Tukey's test,  $p \leq 0.05$ ), ns – not significant. 1–4, harvest period, see also Table 1. Values were calculated as the percentage of the total.

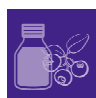**Supplemental Table 5.** Results of three-way analysis of variance for sensory properties of Oblica virgin olive oils obtained from two distinct olive orchards in three successive crop years

| Factor                | Sensory attributes |             |            |             |            |            |            |            |
|-----------------------|--------------------|-------------|------------|-------------|------------|------------|------------|------------|
|                       | Fruity             | Bitter      | Pungent    | Sweet       | Astringent | Green      | Apple      | Almond     |
| <i>Crop Year</i>      |                    |             |            |             |            |            |            |            |
| 2010                  | 5.74±1.3a          | 5.32±1.56b  | 6.46±1.53a | 1.91±1.62ab | 2.30±1.02b | 4.76±1.78a | 1.88±1.00b | 2.86±0.96  |
| 2011                  | 5.90±1.1a          | 5.82±1.54a  | 6.14±0.79a | 1.84±0.94b  | 3.29±2.08a | 4.76±1.18a | 3.30±0.97a | 3.09±0.94  |
| 2012                  | 5.26±1.05b         | 5.21±2.62b  | 5.47±1.13b | 2.38±1.52a  | 3.75±2.18a | 3.94±1.42b | 3.03±0.70a | 3.02±1.58  |
| <i>F</i>              | 8.541              | 15.830      | 9.058      | 6.356       | 39.928     | 5.609      | 39.375     | 2.425      |
| <i>p</i>              | ***                | ***         | ***        | ***         | ***        | ***        | ***        | ns         |
| <i>Growing area</i>   |                    |             |            |             |            |            |            |            |
| Kaštela               | 5.27±1.27b         | 4.26±1.68b  | 5.56±1.26b | 2.58±1.76a  | 2.19±1.00b | 4.18±1.58b | 2.91±0.98a | 2.36±1.07b |
| Šestanovac            | 6.00±0.96a         | 6.55±1.40a  | 6.50±1.05a | 1.52±0.60b  | 3.88±2.13a | 4.83±1.40a | 2.55±1.18b | 3.55±0.93a |
| <i>F</i>              | 26.593             | 312.305     | 19.825     | 55.321      | 154.692    | 8.391      | 2.981      | 68.176     |
| <i>p</i>              | ***                | ***         | ***        | ***         | ***        | ***        | ns         | ***        |
| <i>Harvest period</i> |                    |             |            |             |            |            |            |            |
| 1.                    | 6.12±1.27a         | 5.94±1.78a  | 6.33±1.12a | 1.41±0.65c  | 3.88±1.99a | 5.06±1.42a | 3.14±1.06a | 3.28±1.21  |
| 2.                    | 5.6±1.05ab         | 5.78±1.95ab | 6.22±1.00a | 1.37±0.75c  | 3.33±2.29b | 4.87±1.30a | 2.46±1.02b | 2.81±1.13  |
| 3.                    | 5.74±1.20a         | 5.25±2.00bc | 6.27±1.28a | 2.24±1.05b  | 2.82±1.53b | 4.80±1.59a | 3.07±0.96a | 2.95±0.98  |
| 4.                    | 5.09±1.01b         | 4.77±1.91c  | 5.30±1.40b | 3.25±1.96a  | 2.14±1.16c | 3.18±1.01b | 2.17±1.16b | 2.89±1.36  |
| <i>F</i>              | 12.250             | 20.677      | 8.650      | 41.588      | 16.876     | 15.542     | 9.186      | 2.060      |
| <i>p</i>              | ***                | ***         | ***        | ***         | ***        | ***        | ***        | ns         |

Means marked by different lowercase letters in column for each main factor (crop year, growing area and harvest period), are significantly different (Tukey's test,  $p \leq 0.05$ ). 1–4, harvest period, see also Table 1. Ns – not significant.

**Supplemental Table 6.** Results of three-way analysis of variance for sensory properties of Leccino virgin olive oils obtained from two distinct olive orchards in three successive crop years

| Factor                | Sensory attributes |            |            |            |            |            |            |            |
|-----------------------|--------------------|------------|------------|------------|------------|------------|------------|------------|
|                       | Fruity             | Bitter     | Pungent    | Sweet      | Astringent | Green      | Apple      | Almond     |
| <i>Crop Year</i>      |                    |            |            |            |            |            |            |            |
| 2010                  | 5.97±1.57a         | 6.67±2.09a | 5.78±1.32a | 2.17±1.65b | 2.74±1.38a | 5.56±1.52a | 2.32±1.06a | 3.1±1.03b  |
| 2011                  | 3.93±1.32c         | 3.95±2.44b | 4.43±1.63b | 2.98±1.53a | 2.17±2.24a | 2.86±1.29c | 2.37±0.83a | 1.63±0.83c |
| 2012                  | 5.29±0.81b         | 3.34±2.04c | 4.24±1.29b | 3.09±1.56a | 1.68±1.07b | 3.6±0.75b  | 2.39±0.66a | 3.89±0.98a |
| <i>F</i>              | 48.264             | 155.748    | 24.481     | 5.201      | 19.635     | 139.072    | 1.663      | 77.028     |
| <i>p</i>              | ***                | ***        | ***        | ***        | ***        | ***        | ns         | ***        |
| <i>Growing area</i>   |                    |            |            |            |            |            |            |            |
| Kaštela               | 4.69±1.55b         | 3.23±2.24b | 4.34±1.48b | 3.71±1.39a | 1.23±0.75b | 3.37±1.45b | 2.18±0.82b | 2.67±1.43b |
| Šestanovac            | 5.55±1.38a         | 6.22±2.08a | 5.37±1.48a | 1.74±1.17b | 3.2±1.72a  | 4.79±1.61a | 2.54±0.87a | 3.16±1.16a |
| <i>F</i>              | 40.499             | 385.779    | 35.357     | 99.508     | 218.484    | 109.522    | 9.058      | 14.838     |
| <i>p</i>              | ***                | ***        | ***        | ***        | ***        | ***        | **         | ***        |
| <i>Harvest period</i> |                    |            |            |            |            |            |            |            |
| 1.                    | 5.03±1.48c         | 4.18±2.64c | 4.53±1.36c | 3.06±1.61a | 2.37±1.8a  | 4.24±1.45b | 1.8±0.79b  | 3.24±1.49a |
| 2.                    | 6.15±1.61a         | 6.16±2.52a | 5.86±1.27a | 2.48±1.52b | 2.49±1.67a | 5.22±1.57a | 2.96±0.44a | 3.29±1.11a |
| 3.                    | 5.42±1.00b         | 5.35±2.24b | 5.31±1.28b | 1.84±1.46b | 2.51±1.77a | 4.00±1.52b | 2.57±0.90a | 3.11±1.23a |
| 4.                    | 3.95±1.18d         | 3.25±2.33d | 3.75±1.53d | 3.59±1.42a | 1.53±1.24b | 3.02±1.53c | 2.06±0.79b | 2.10±1.16b |
| <i>F</i>              | 31.690             | 54.668     | 29.524     | 13.040     | 13.841     | 46.713     | 18.305     | 15.074     |
| <i>p</i>              | ***                | ***        | ***        | ***        | ***        | ***        | ***        | ***        |

Means marked by different lowercase letters in column for each main factor (crop year, growing area and harvest period), are significantly different (Tukey's test,  $p \leq 0.05$ ). 1–4, harvest period, see also Table 1. Ns – not significant.



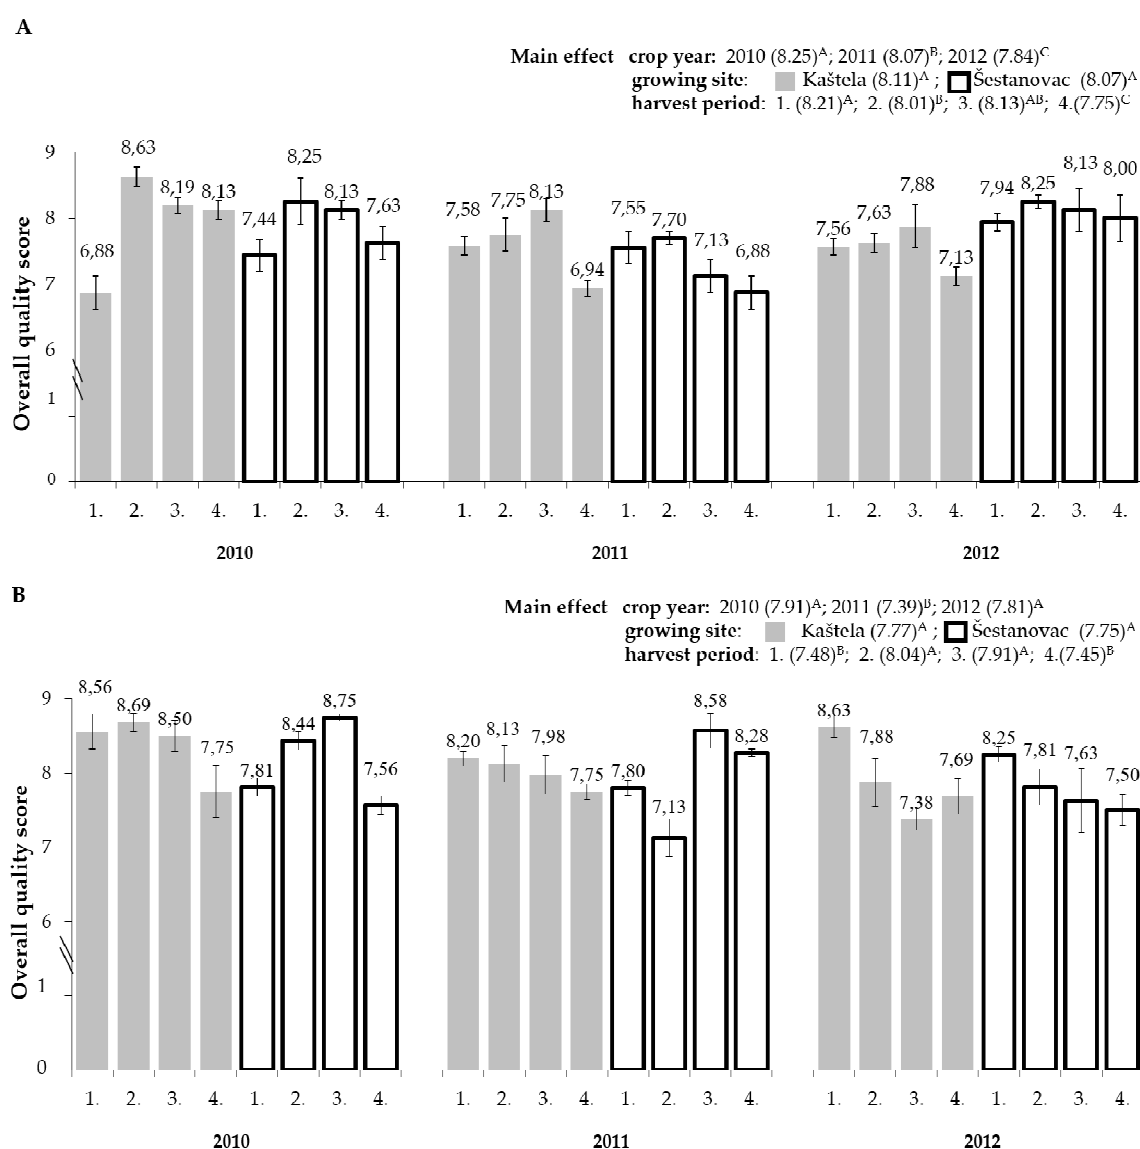

**Supplemental Figure 1.** Overall quality score of A) Oblica and B) Leccino virgin olive oils obtained from two distinct olive orchards in three successive crop years, 2010, 2011 and 2012 respectively. Different uppercase letters indicate differences within main effects (crop year, growing area and harvest period) obtained by three-way ANOVA (Tukey's test,  $p \leq 0.05$ ). 1–4, harvest period, see also Table 1.
